# Supplementary material
Source: Springer Nature journal article supplement (https://www.springermedizin.de/resource/supplementary/12885_2006_549_MOESM8_ESM.pdf/9469734)

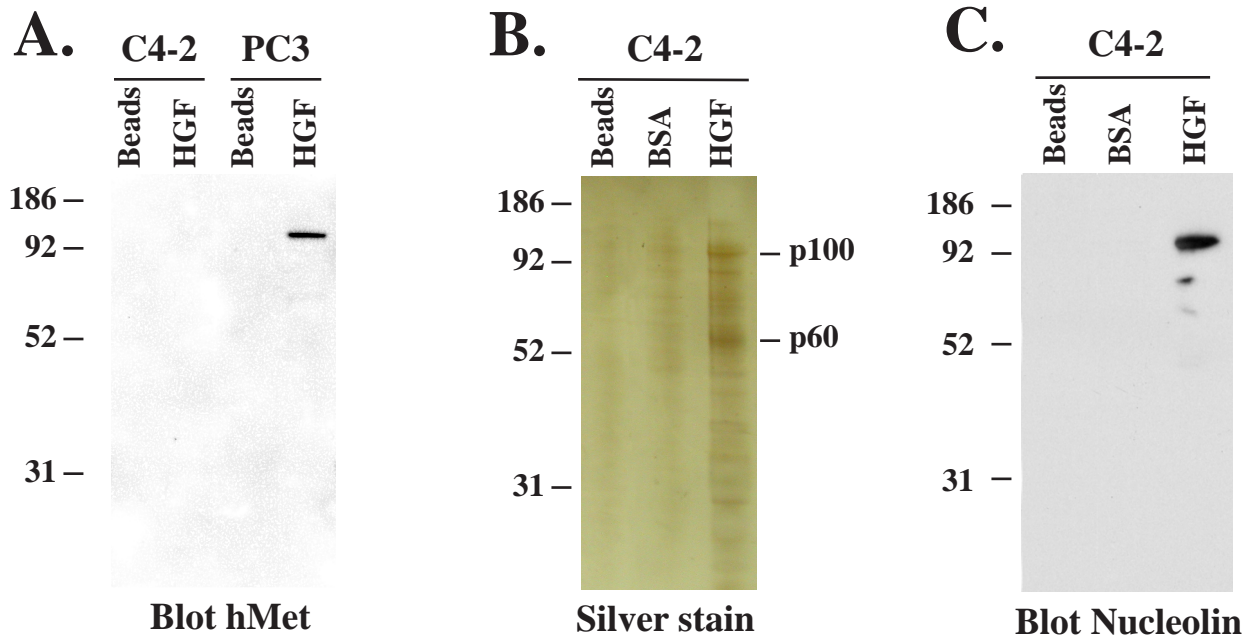

**D.**

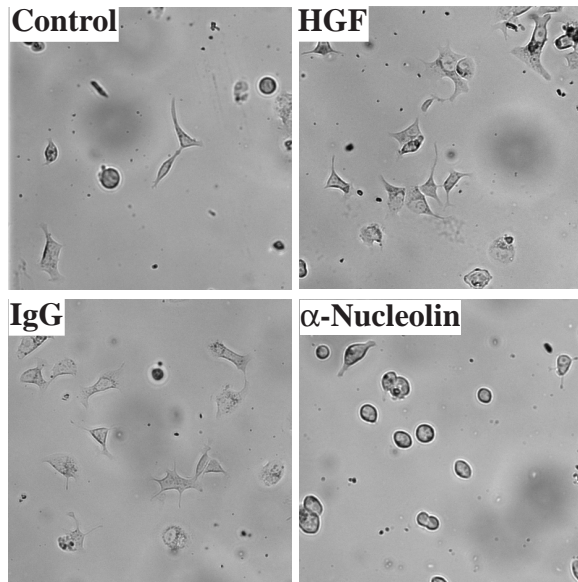

**E.**

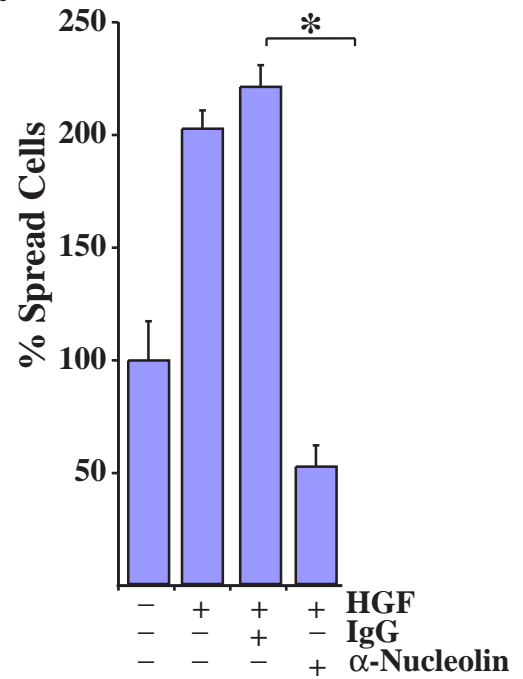

Figure 6. Tate et al.

Supplement: MOESM8 [file 9469734]
